# Supplementary material for: Calm before the Storm: A Glimpse into the Secondary Metabolism of Aspergillus welwitschiae, the Etiologic Agent of the Sisal Bole Rot
Source: PubMed Central journal article supplement (PMC6891411; doi:10.3390/toxins11110631), 2019-10-30
Supplement: toxins-11-00631-s001.pdf [file toxins-11-00631-s001.pdf]

# Supplementary Material: Calm Before the Storm: A Glimpse into the Secondary Metabolism of *Aspergillus welwitschiae*, the Etiologic Agent of the Sisal Bole Rot

Gabriel Quintanilha-Peixoto, Rosimére Oliveira Torres, Isabella Mary Alves Reis, Thiago Alves Santos de Oliveira, Dener Eduardo Bortolini, Elizabeth Amélia Alves Duarte, Vasco Ariston de Carvalho Azevedo, Bertram Brenig, Eric Roberto Guimarães Rocha Aguiar, Ana Cristina Fermino Soares, Aristóteles Góes-Neto and Alessandro Branco

**Table S1.** Fractions were obtained (Table S1) and analyzed in HPLC coupled to a photodiode array. Yield value refers to initial 0.87 g.

| Fraction | Solvent System (%)                 | Mass (g) | Yield (%) |
|----------|------------------------------------|----------|-----------|
| Fr-1     | Hexane (100)                       | 0,0139   | 1,61%     |
| Fr-2     | Hexane (100)                       | 0,0273   | 3,15%     |
| Fr-3     | Hexane: Ethyl acetate (80:20)      | 0,0998   | 11,52%    |
| Fr-4     | Hexane: Ethyl acetate (70:30)      | 0,0374   | 4,32%     |
| Fr-5     | Hexane: Ethyl acetate (60:40)      | 0,0175   | 2,02%     |
| Fr-6     | Hexane: Ethyl acetate (50:50)      | 0,0155   | 1,79%     |
| Fr-7     | Hexane: Ethyl acetate (50:50)      | 0,0234   | 2,70%     |
| Fr-8     | Hexane: Ethyl acetate (50:50)      | 0,0134   | 1,55%     |
| Fr9-10   | Hexane: Ethyl acetate (40:60)      | 0,0101   | 1,17%     |
| Fr-11    | Hexane: Ethyl acetate (30:70)      | 0,0089   | 1,03%     |
| Fr-12    | Hexane: Ethyl acetate (10:90)      | 0,0133   | 1,54%     |
| Fr-13    | Ethyl acetate (100)                | 0,0170   | 1,96%     |
| Fr-14    | Ethyl acetate: Methanol (80:20)    | 0,0204   | 2,36%     |
| Fr15-16  | Ethyl acetate: Methanol (70:30)    | 0,0197   | 2,27%     |
| Fr-17    | Ethyl acetate: Methanol (50:50)    | 0,0123   | 1,42%     |
| Fr18-19  | Ethyl acetate: Methanol (30:70)    | 0,0489   | 5,65%     |
| Fr-20    | Ethyl acetate: Methanol (20:80)    | 0,0080   | 0,92%     |
| Fr-21    | Methanol (100)                     | 0,0055   | 0,64%     |
| Fr-22    | Methanol: H <sub>2</sub> O (50:50) | 0,0042   | 0,48%     |
| Fr-23    | Methanol: H <sub>2</sub> O (50:50) | 0,0041   | 0,47%     |
| Fr-24    | H <sub>2</sub> O (100)             | 0,0076   | 0,88%     |

Table S2. References used for BLAST analysis.

| Compound      | Gene                                                                                        | Situation    | Organism                                            | Accession     | Reference                      | Seq |
|---------------|---------------------------------------------------------------------------------------------|--------------|-----------------------------------------------------|---------------|--------------------------------|-----|
| Compactin     | mlcH, mlcG,<br>mlcF, mlcA,<br>mlcC, mlcB,<br>mlcD, mlcE,<br>mlcR                            | Full Cluster | <i>Penicillium<br/>citrinum</i>                     | AB072893.1    | 10.1007/s00438-002-0697-<br>y  | NT  |
| Malformin C   | mlfA                                                                                        | CDS          | <i>Aspergillus<br/>vadensis</i> CBS<br>113365       | A0A319BQC1.1  | 10.1038/s41598-018-<br>36561-3 | NT  |
|               |                                                                                             |              | <i>Aspergillus<br/>neoniger</i> CBS<br>115656       | A0A318Z3U0.1  | 10.1038/s41598-018-<br>36561-3 | NT  |
|               |                                                                                             |              | <i>Aspergillus<br/>niger</i> CBS<br>513.88          | A2QYX4.1      | 10.1038/s41598-018-<br>36561-3 | NT  |
|               |                                                                                             |              | <i>Aspergillus<br/>niger</i> ATCC<br>1015           | G3XUF0.1      | 10.1038/s41598-018-<br>36561-3 | NT  |
|               |                                                                                             |              | <i>Aspergillus<br/>luchuensis</i><br>CBS 106.47     | A0A1M3T4K3.1  | 10.1038/s41598-018-<br>36561-3 | NT  |
|               |                                                                                             |              | <i>Aspergillus<br/>lacticoffeatus</i><br>CBS 101883 | A0A319A6V2.1  | 10.1038/s41598-018-<br>36561-3 | NT  |
|               |                                                                                             |              | <i>Aspergillus<br/>kawachii</i> IFO<br>4308         | G7XQ31.1      | 10.1038/s41598-018-<br>36561-3 | NT  |
|               |                                                                                             |              | <i>Aspergillus<br/>homomorphus</i><br>CBS 101889    | A0A395I3F8.1  | 10.1038/s41598-018-<br>36561-3 | NT  |
| Trichothecene | TRI8, TRI7,<br>TRI3, TRI4,<br>TRI6, TRI5,<br>TRI10, TRI9,<br>TRI11, TRI12,<br>TRI13, TRI14, | Full Cluster | <i>Fusarium<br/>sporotrichioides</i>                | AF359360.3    | 10.1006/fgbi.2001.1256         | NT  |
|               | TRI8, TRI7,<br>TRI3, TRI4,<br>TRI6, TRI5,<br>TRI10, TRI9,<br>TRI11, TRI12,<br>TRI13, TRI14, |              | <i>Gibberella zeae</i><br>GZ3639                    | AF359361.3    | 10.1006/fgbi.2001.1256         | NT  |
|               | TRI13                                                                                       | CDS          | <i>Gibberella zeae</i><br>HKM136                    | AY057841.1    | 10.1006/fgbi.2001.1256         | NT  |
| Ochratoxin    | ota1-5                                                                                      | Full Cluster | <i>Aspergillus<br/>welwitschiae</i><br>ITEM 7468    | KX267735      | 10.3389/fmicb.2016.01412       | NT  |
|               |                                                                                             |              | <i>Aspergillus<br/>welwitschiae</i><br>ITEM 11945   | KX267737      | 10.3389/fmicb.2016.01412       | NT  |
|               |                                                                                             |              | <i>Aspergillus<br/>niger</i> ITEM<br>10355          | KX267736      | 10.3389/fmicb.2016.01412       | NT  |
|               | ota1                                                                                        | CDS          | <i>Aspergillus<br/>niger</i> CBS<br>513.88          | ANI_1_1826134 | 10.3389/fmicb.2016.01412       | AA  |

|           |        |                                     |                                     |                          |                          |    |
|-----------|--------|-------------------------------------|-------------------------------------|--------------------------|--------------------------|----|
|           | ota2   | CDS                                 | <i>Aspergillus niger</i> CBS 513.88 | An15g07890               | 10.3389/fmicb.2016.01412 | AA |
|           | ota3   | CDS                                 | <i>Aspergillus niger</i> CBS 513.88 | ANI_1_1830134            | 10.3389/fmicb.2016.01412 | AA |
|           | ota4   | CDS                                 | <i>Aspergillus niger</i> CBS 513.88 | ANI_1_1832134            | 10.3389/fmicb.2016.01412 | AA |
|           | ota5   | CDS                                 | <i>Aspergillus niger</i> CBS 513.88 | ANI_1_1836134            | 10.3389/fmicb.2016.01412 | AA |
| Fumonisin | fum6   | CDS                                 | <i>Aspergillus niger</i> CBS 513.88 | ANI_1_2654014            | 10.3389/fmicb.2016.01412 | AA |
|           | fum10  | CDS                                 | <i>Aspergillus niger</i> CBS 513.88 | ANI_1_2658014            | 10.3389/fmicb.2016.01412 | AA |
|           | fum7   | CDS                                 | <i>Aspergillus niger</i> CBS 513.88 | ANI_1_2660014            | 10.3389/fmicb.2016.01412 | AA |
|           | fum3   | CDS                                 | <i>Aspergillus niger</i> CBS 513.88 | ANI_1_892014             | 10.3389/fmicb.2016.01412 | AA |
|           | fum8   | CDS                                 | <i>Aspergillus niger</i> CBS 513.88 | ANI_1_894014             | 10.3389/fmicb.2016.01412 | AA |
|           | fum13  | CDS                                 | <i>Aspergillus niger</i> CBS 513.88 | ANI_1_2662014            | 10.3389/fmicb.2016.01412 | AA |
|           | fum14  | CDS                                 | <i>Aspergillus niger</i> CBS 513.88 | ANI_1_2664014            | 10.3389/fmicb.2016.01412 | AA |
|           | fum15  | CDS                                 | <i>Aspergillus niger</i> CBS 513.88 | ANI_1_2668014            | 10.3389/fmicb.2016.01412 | AA |
|           | fum1   | CDS                                 | <i>Aspergillus niger</i> CBS 513.88 | ANI_1_2672014            | 10.3389/fmicb.2016.01412 | AA |
|           | fum19  | CDS                                 | <i>Aspergillus niger</i> CBS 513.88 | 205909                   | 10.3389/fmicb.2016.01412 | AA |
|           | fum21  | CDS                                 | <i>Aspergillus niger</i> CBS 513.88 | 225717                   | 10.3389/fmicb.2016.01412 | AA |
|           | sdr1   | CDS                                 | <i>Aspergillus niger</i> CBS 513.88 | 51907                    | 10.3389/fmicb.2016.01412 | AA |
|           | gene B | CDS                                 | <i>Aspergillus niger</i> CBS 513.88 | 35994                    | 10.3389/fmicb.2016.01412 | AA |
|           | gene C | CDS                                 | <i>Aspergillus niger</i> CBS 513.88 | 171442                   | 10.3389/fmicb.2016.01412 | AA |
| gene D    | CDS    | <i>Aspergillus niger</i> CBS 513.88 | 171846                              | 10.3389/fmicb.2016.01412 | AA                       |    |

**Table S3.** Assembly metrics, generated with scaffold\_stats.pl, for *Aspergillus welwitschiae* isolates CCMB674 and CBS 139.54.

| <b>FileNames</b>                                 | <b>CCMB 674</b> | <b>CBS 139.54</b> |
|--------------------------------------------------|-----------------|-------------------|
| Longest Scaffold                                 | 2008406         | 2162797           |
| Num                                              | 244             | 396               |
| Span                                             | 38188994        | 37511876          |
| Min                                              | 1046            | 1010              |
| Mean                                             | 156512          | 94726             |
| N50                                              | 456288          | 757052            |
| NumN50                                           | 23              | 17                |
| GC                                               | 0.483           | 0.497             |
| <b>For Runs of Ns (<math>\geq 10</math> Ns):</b> |                 |                   |
| Num                                              | 9               | 118               |
| Span                                             | 436             | 33835             |
| N50                                              | 96              | 1190              |

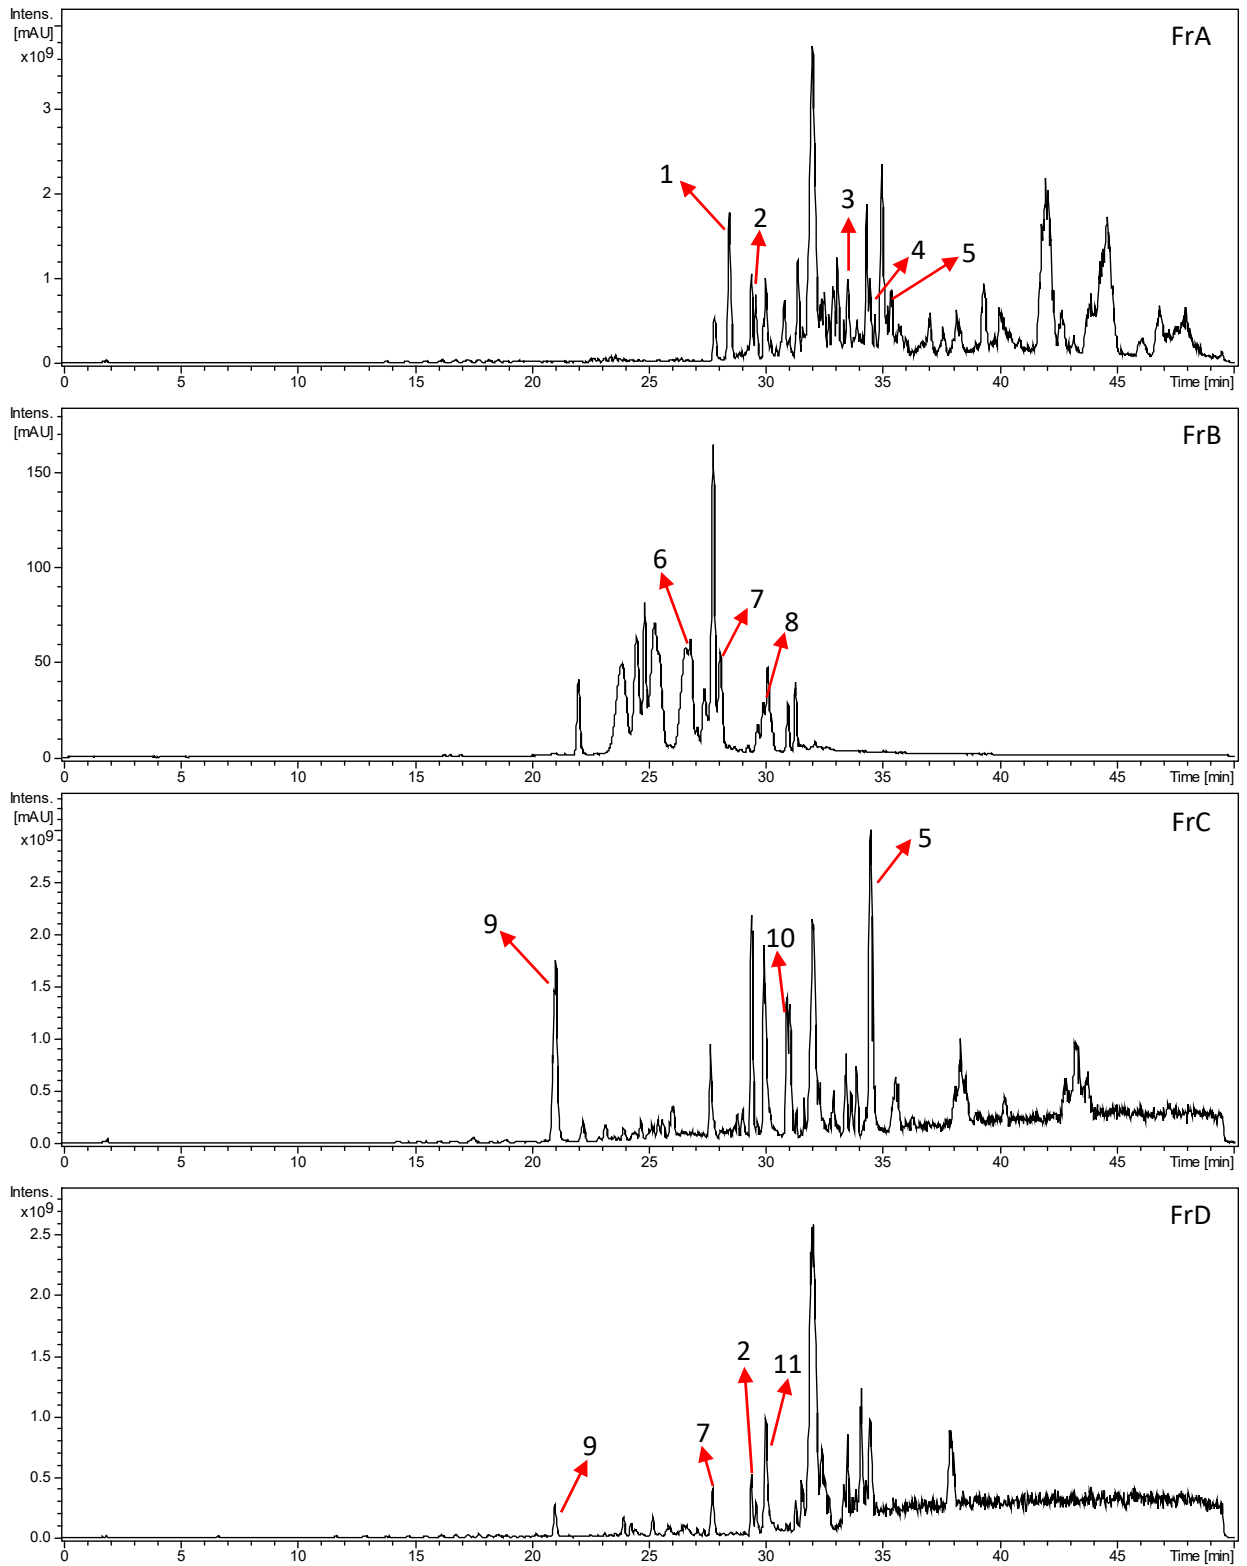

**Figure S1.** Chromatograms for Fractions A-D.

Mass Spectrometer: Amazon Speed ETD - Bruker

Nebulizer: 27 Psi

HV: 4500V

Dry gas: 12 L/min

ESI+

Temp: 300 °C

## HPLC:

Controler: CBM-20A- Shimadzu

Solvent B: Methanol

Pump: LC-20AD Shimadzu

Column: Phenomenex Luna C18 (250x4.6mm  
– 5um)

Detector: SPD-20A - Shimadzu

Oven Temp: environment

Oven: CTO-20A - Shimadzu

Flux: 1 ml/min

Autosampler: SIL 20AC – Shimadzu

Solvent A: H2O 0,1% Acetic Acid

Gradient: 0 min A:B (100:0) 30 min A:B (0:100) 46 min A:B (0:100) 47 min A:B (80:20) 50 min A:B (80:20)

## Soma\_rede.py

```
# -*- Coding: UTF-8 -*-
#coding: utf-8
import sys
if (len(sys.argv)!=2):
    print ("Please enter file name (Ex: python somaRede.py rede.txt)")
    sys.exit()
nomeArquivo=sys.argv[1]
# nomeArquivo="rede.txt"
arquivoRede=open(nomeArquivo, 'r')
resultado=[]
for linha in arquivoRede:
    index=linha.rfind(";")
    nome=linha[0:index]
    achou=0
    for item in resultado:
        if (item[0].find(nome)!=-1):
            item[1]=item[1]+float(linha[index+1:].rstrip())
            achou=1
            break
    if (achou==0):
        aux=[nome,float(linha[index+1:])]
        resultado.append(aux)
arqSaida=open(nomeArquivo[0:nomeArquivo.find(".")]+"_rst.txt", 'w')
for item in resultado:
    arqSaida.write(item[0]+";"+str(item[1])+"\n")
print(item[0]+";"+str(item[1]))
```

```
arqSaida.close()
```

```
arquivoRede.close()
```
